# Supplementary material for: In-vitro evaluation of apoptotic effect of OEO and thymol in 2D and 3D cell cultures and the study of their interaction mode with DNA
Source: PubMed Central journal article supplement (PMC6202332; doi:10.1038/s41598-018-34055-w), 2018-10-25
Supplement: 41598_2018_34055_MOESM1_ESM.pdf [file 41598_2018_34055_MOESM1_ESM.pdf]

Supplementary Information

*In-vitro* evaluation of apoptotic effect of OEO and thymol in 2D and 3D cell cultures and the study of their interaction mode with DNA

TAHEREH JAMALI<sup>1</sup>, GHOLAMREZA KAVOOSI<sup>2</sup>, MALIHEH SAFAVI<sup>3</sup>, SUSAN K. ARDESTANI<sup>1\*</sup>

1. INSTITUTE OF BIOCHEMISTRY AND BIOPHYSICS, UNIVERSITY OF TEHRAN, TEHRAN, IRAN

2. INSTITUTE OF BIOTECHNOLOGY, SHIRAZ UNIVERSITY, SHIRAZ, IRAN

3. DEPARTMENT OF BIOTECHNOLOGY, IRANIAN RESEARCH ORGANIZATION FOR SCIENCE AND TECHNOLOGY, TEHRAN, IRAN

\* CORRESPONDING AUTHOR: ARDESTANY@UT.AC.IR

BCL2

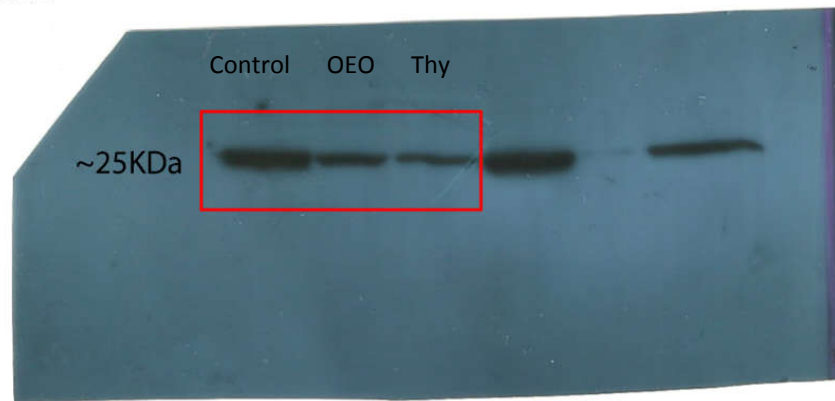

Bax

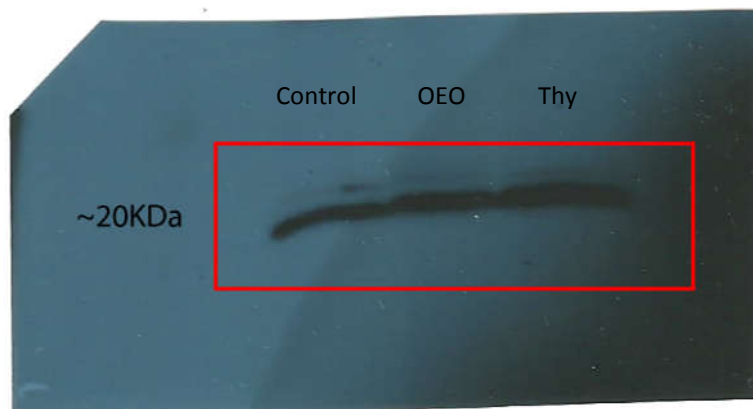

$\beta$ -actin

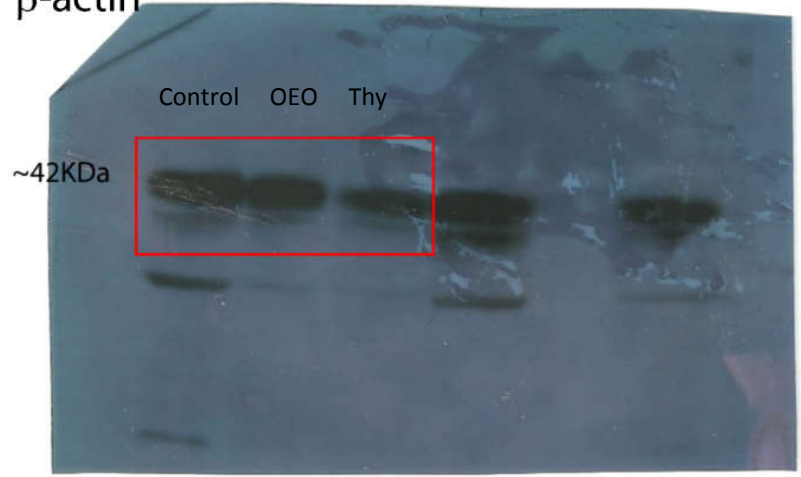

Caspase9

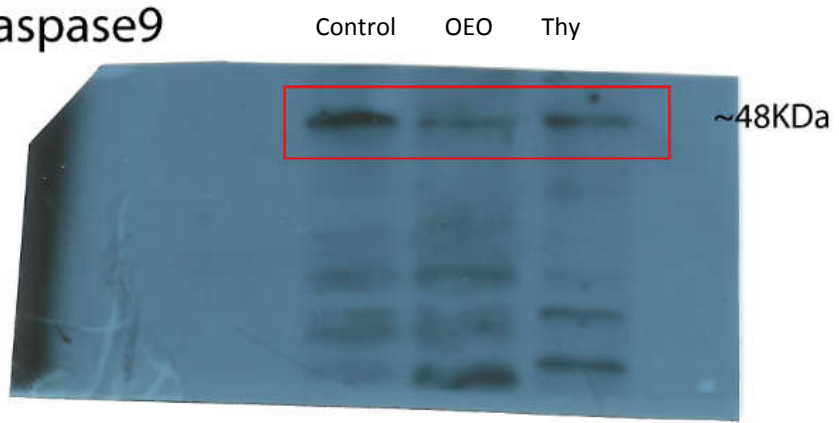

## Caspase8

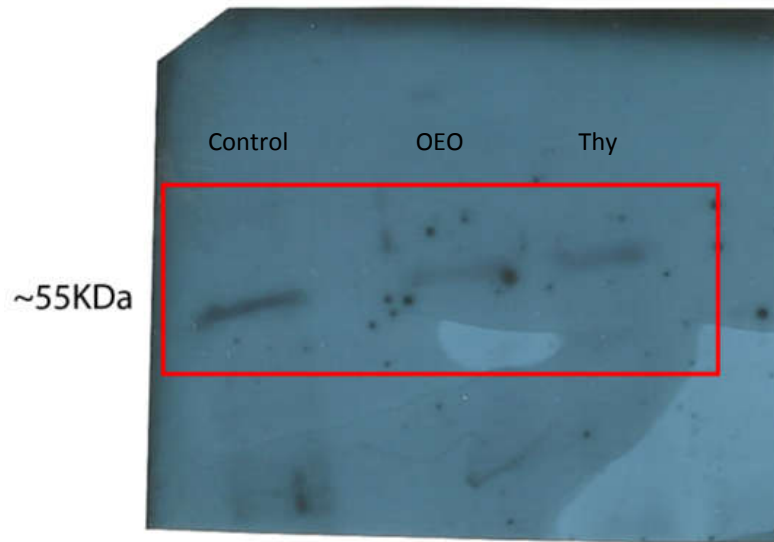

## Caspase3

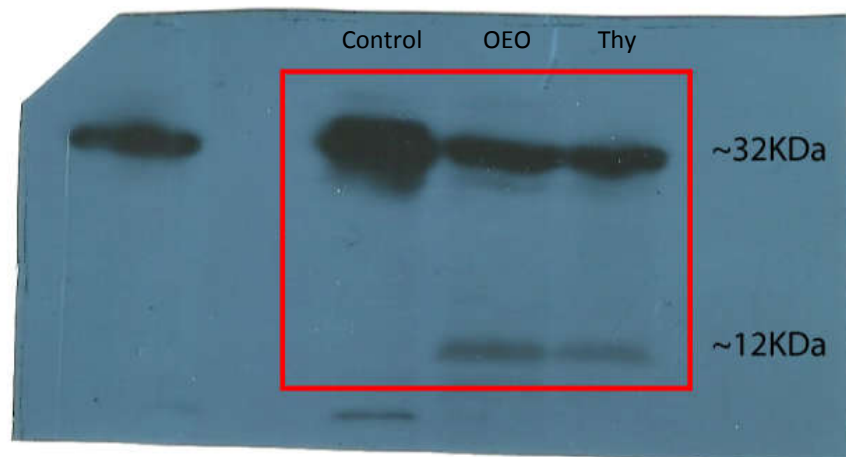

Fig S1: The full length blots or original images for Fig. 9.
